# Supplementary material for: Late Eocene to early Oligocene productivity events in the proto-Southern Ocean and correlation to climate change
Source: Copernicus journal article supplement (doi:10.5194/cp-20-1327-2024), 2024-06-14
Supplement: Supplementary file 1 [file cp-20-1327-2024-supplement.zip]

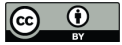

*Supplement of*

**Late Eocene to early Oligocene productivity events in the proto-Southern Ocean and correlation to climate change**

**Gabrielle Rodrigues de Faria et al.**

*Correspondence to:* Gabrielle Rodrigues de Faria ([gabrielle.faria@mfn.berlin](mailto:gabrielle.faria@mfn.berlin))

- [cp-20-1327-2024-supplement-title-page.pdf](#)
- [supplement.docx](#)

The copyright of individual parts of the supplement might differ from the article licence.
