# Supplementary material for: Late Eocene to early Oligocene productivity events in the proto-Southern Ocean and correlation to climate change
Source: Copernicus journal article supplement (doi:10.5194/cp-20-1327-2024), 2024-06-14
Supplement: Supplementary file 1 [file supplement.docx]

Supplementary Information for

**Late Eocene to early Oligocene productivity events in the proto-Southern Ocean and correlation to climate change**

Gabrielle R. de Faria1,2, David Lazarus1, Johan Renaudie, Jessica1 Stammeier3, Volkan Özen1,2,Ulrich Struck1,2

1 Museum für Naturkunde, Leibniz Institute for Evolution and Biodiversity Science, Invalidenstraße 43, 10115, Berlin, Germany

2 Freie Universität Berlin, Institute for Geological Sciences, Malteserstraße 74-100, 12249 Berlin, Germany

3GFZ German Research Centre for Geosciences, Telegrafenberg, 14473 Potsdam, Germany

**Contents of this file**

Figures S1 to S7

Tables S1 and S2

**Introduction**

This supplement includes the age models for ODP sites 1090, 748, 689 (Figures S1 to S3), as well as for ODP Site 738 (Figure S4) as we compare our results to published data from this site, and the age model(s) are relevant to our interpretations. It also includes sedimentation rates compared to biogenic barium accumulation rates (Figure S5). Tables S1 and S2 show the data included in our compilation of Neodymium isotopes and atmospheric carbon dioxide.

**Figure S1. Age depth plot, ODP Site 1090. This site benefits from a robust paleomagnetic stratigraphy**
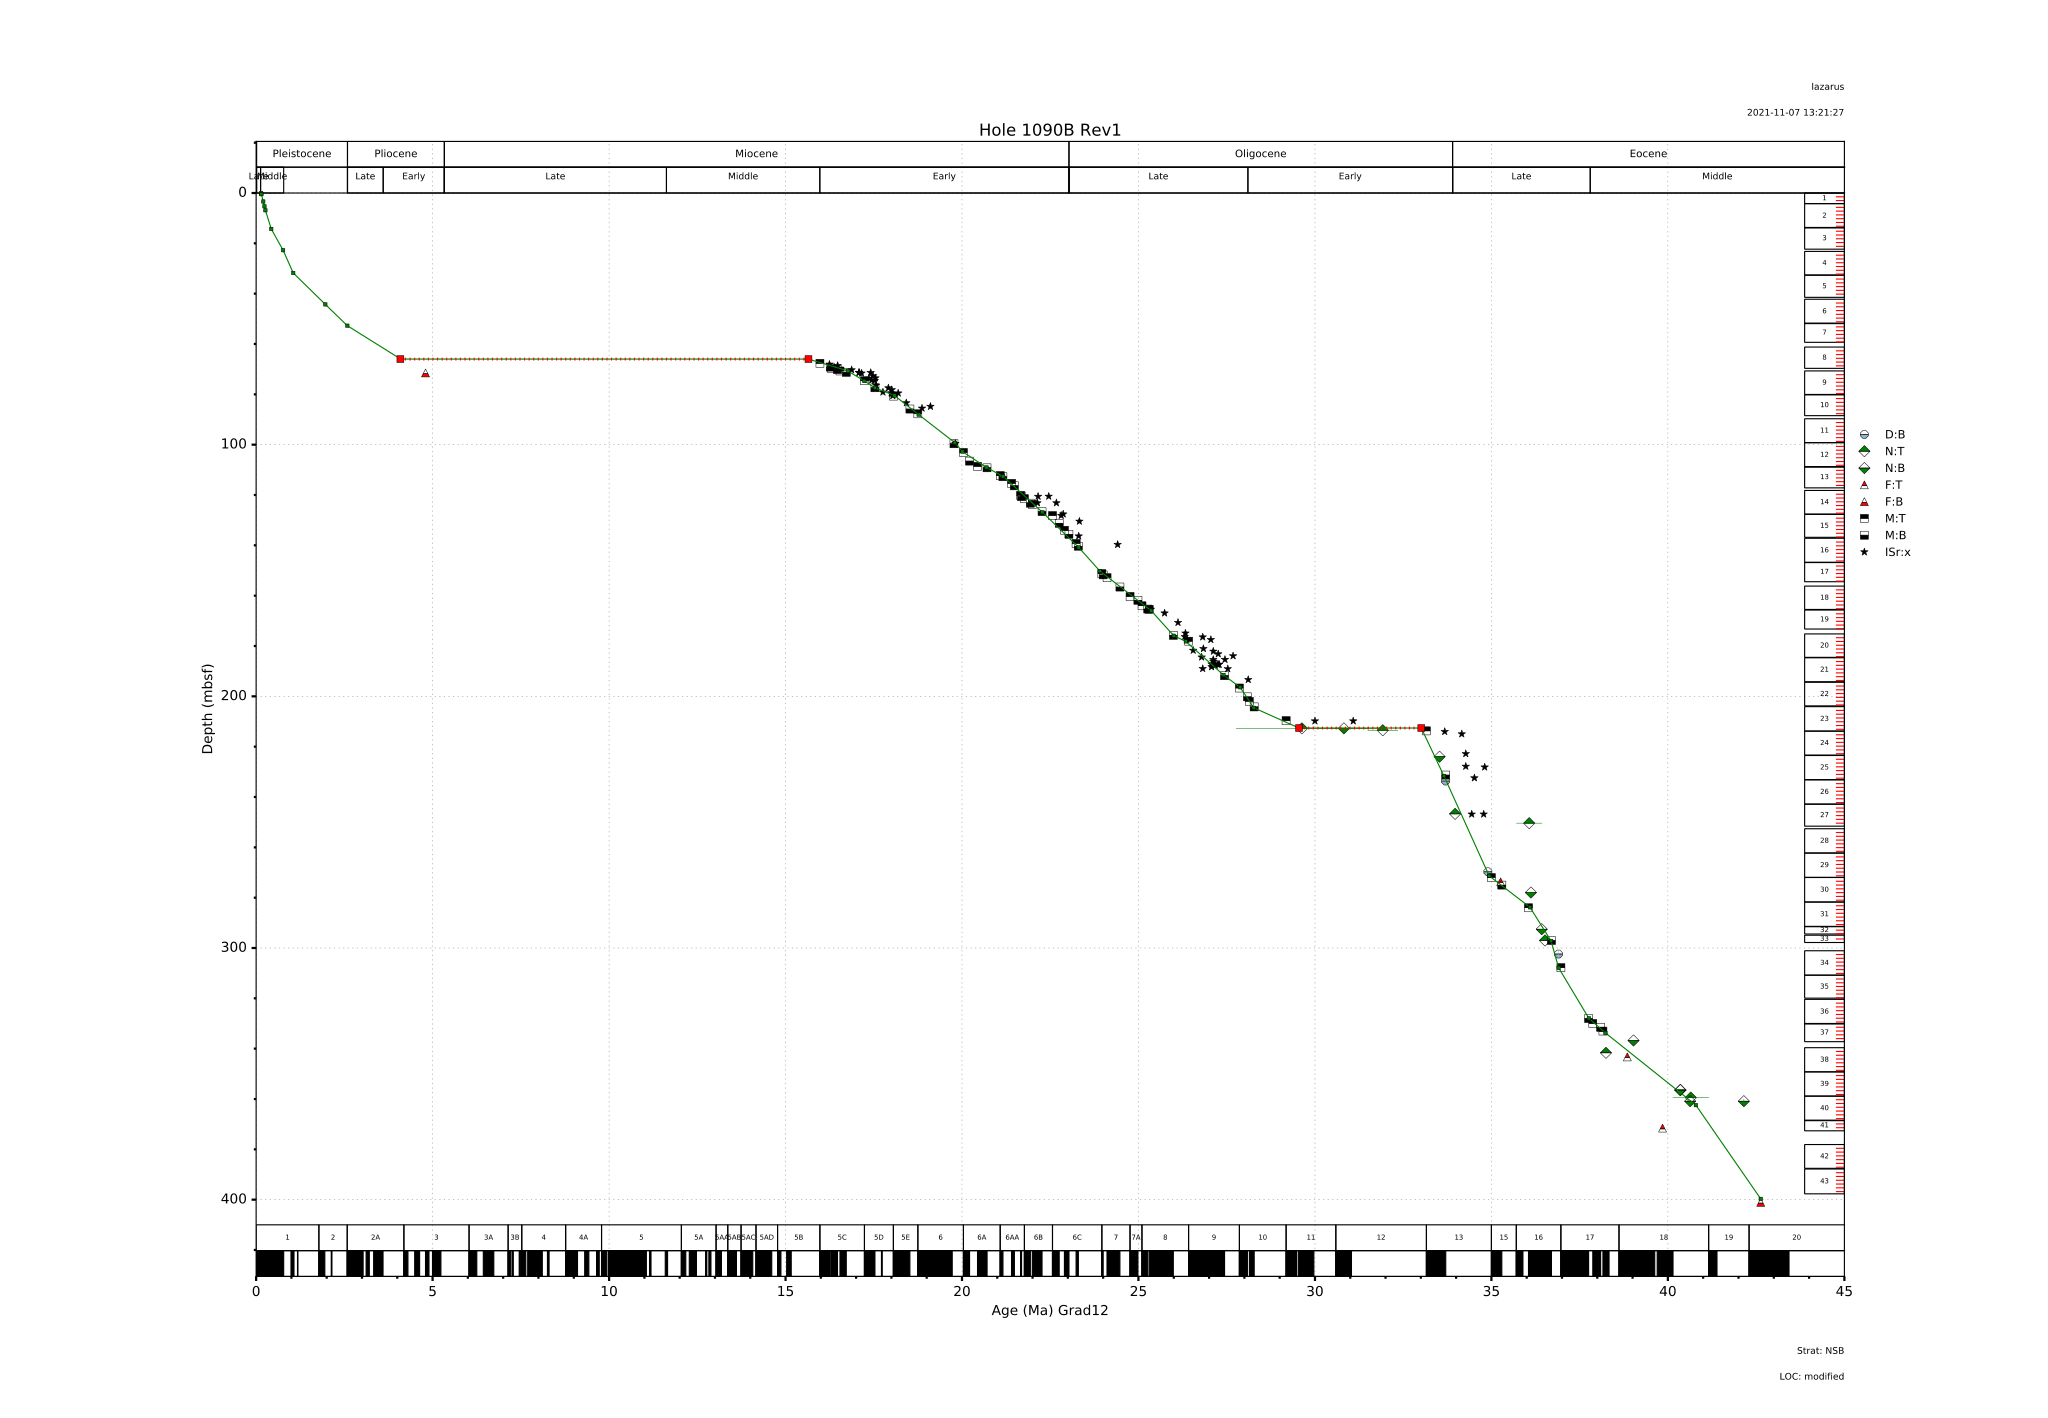
 **supported by coherent multiple fossil group biostratigraphy, and in the late Eocene - Oligocene strontium isotope stratigraphy. Sources of geochronological data and interpretations are given in detail in Channell et al. (2003). D - diatom, F - planktonic foraminifera, I - isotope (Strontium, Oxygen event, etc.), M - paleomagnetic stratigraphy reversal boundary pick, N - calcareous nannofossil, R - radiolaria; B - bottom, T - top. Other plotting conventions for these and other age depth plots in this SOM are given in the description of the plotting program ADP (Renaudie et al., 2020) and the companion user guide to the program (https://github.com/plannapus/nsb_adp_wx/releases). All age models, and the data used to create them, are available at the NSB website ([https://nsb.mfn-berlin.de](https://nsb.mfn-berlin.de/))**


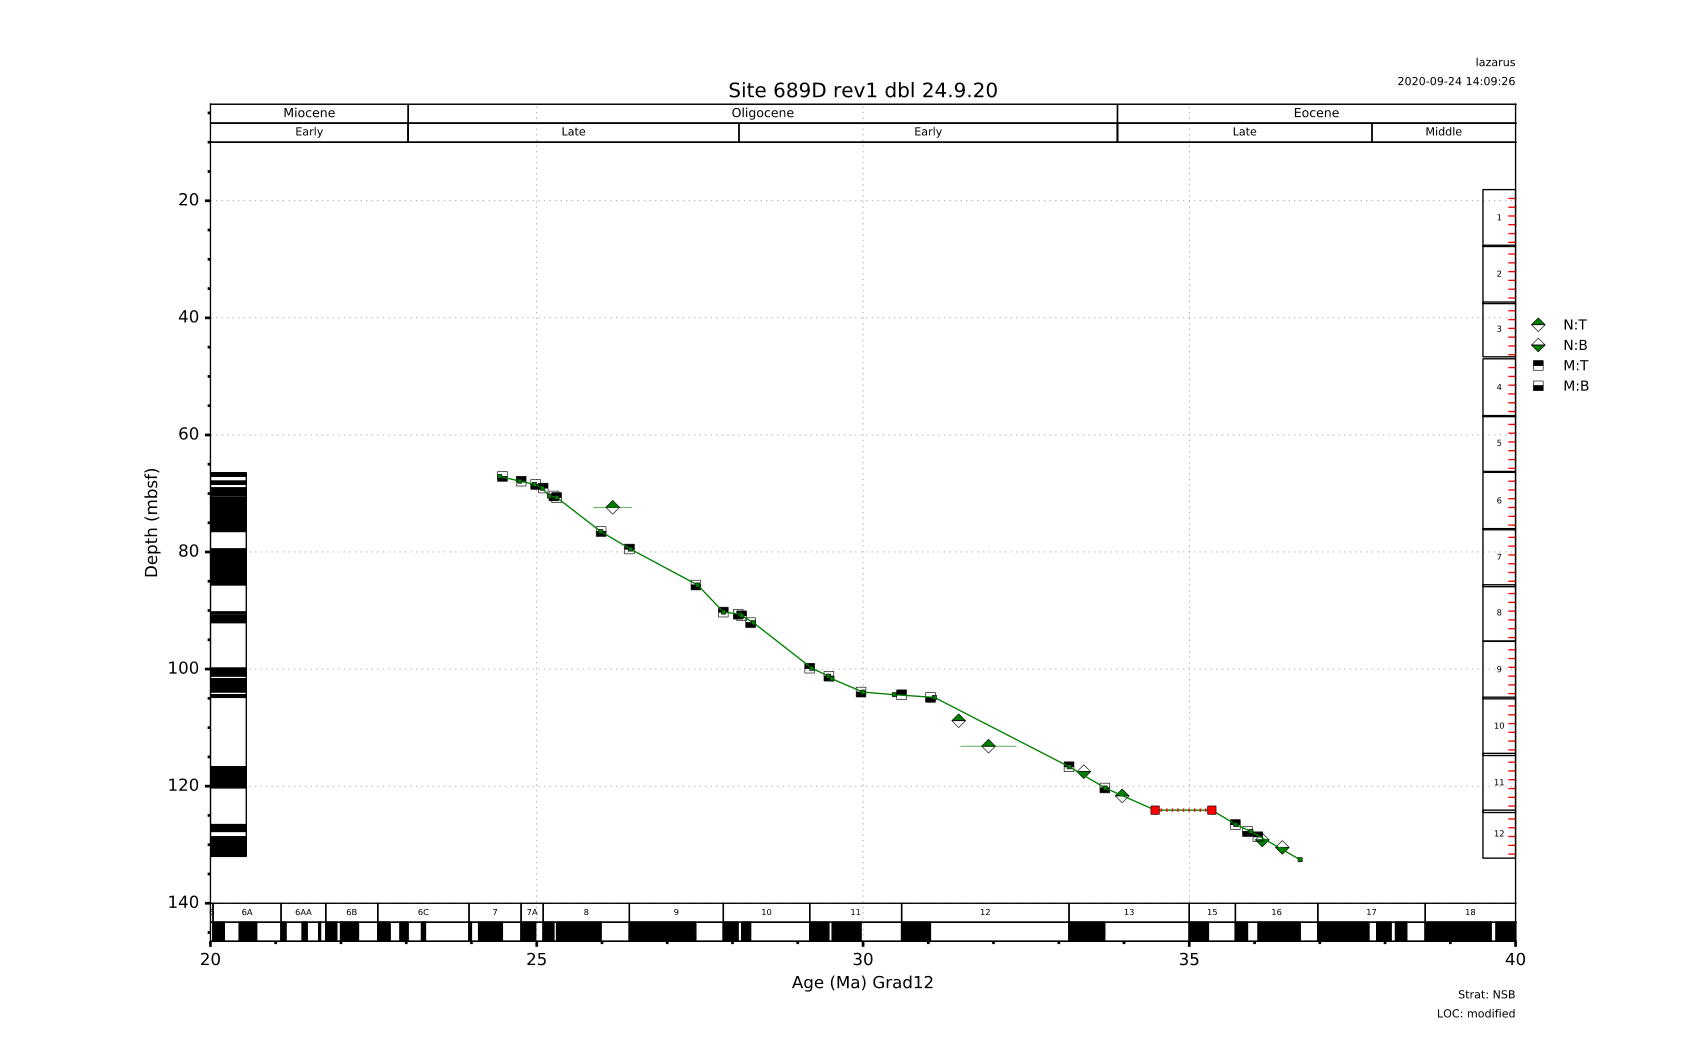


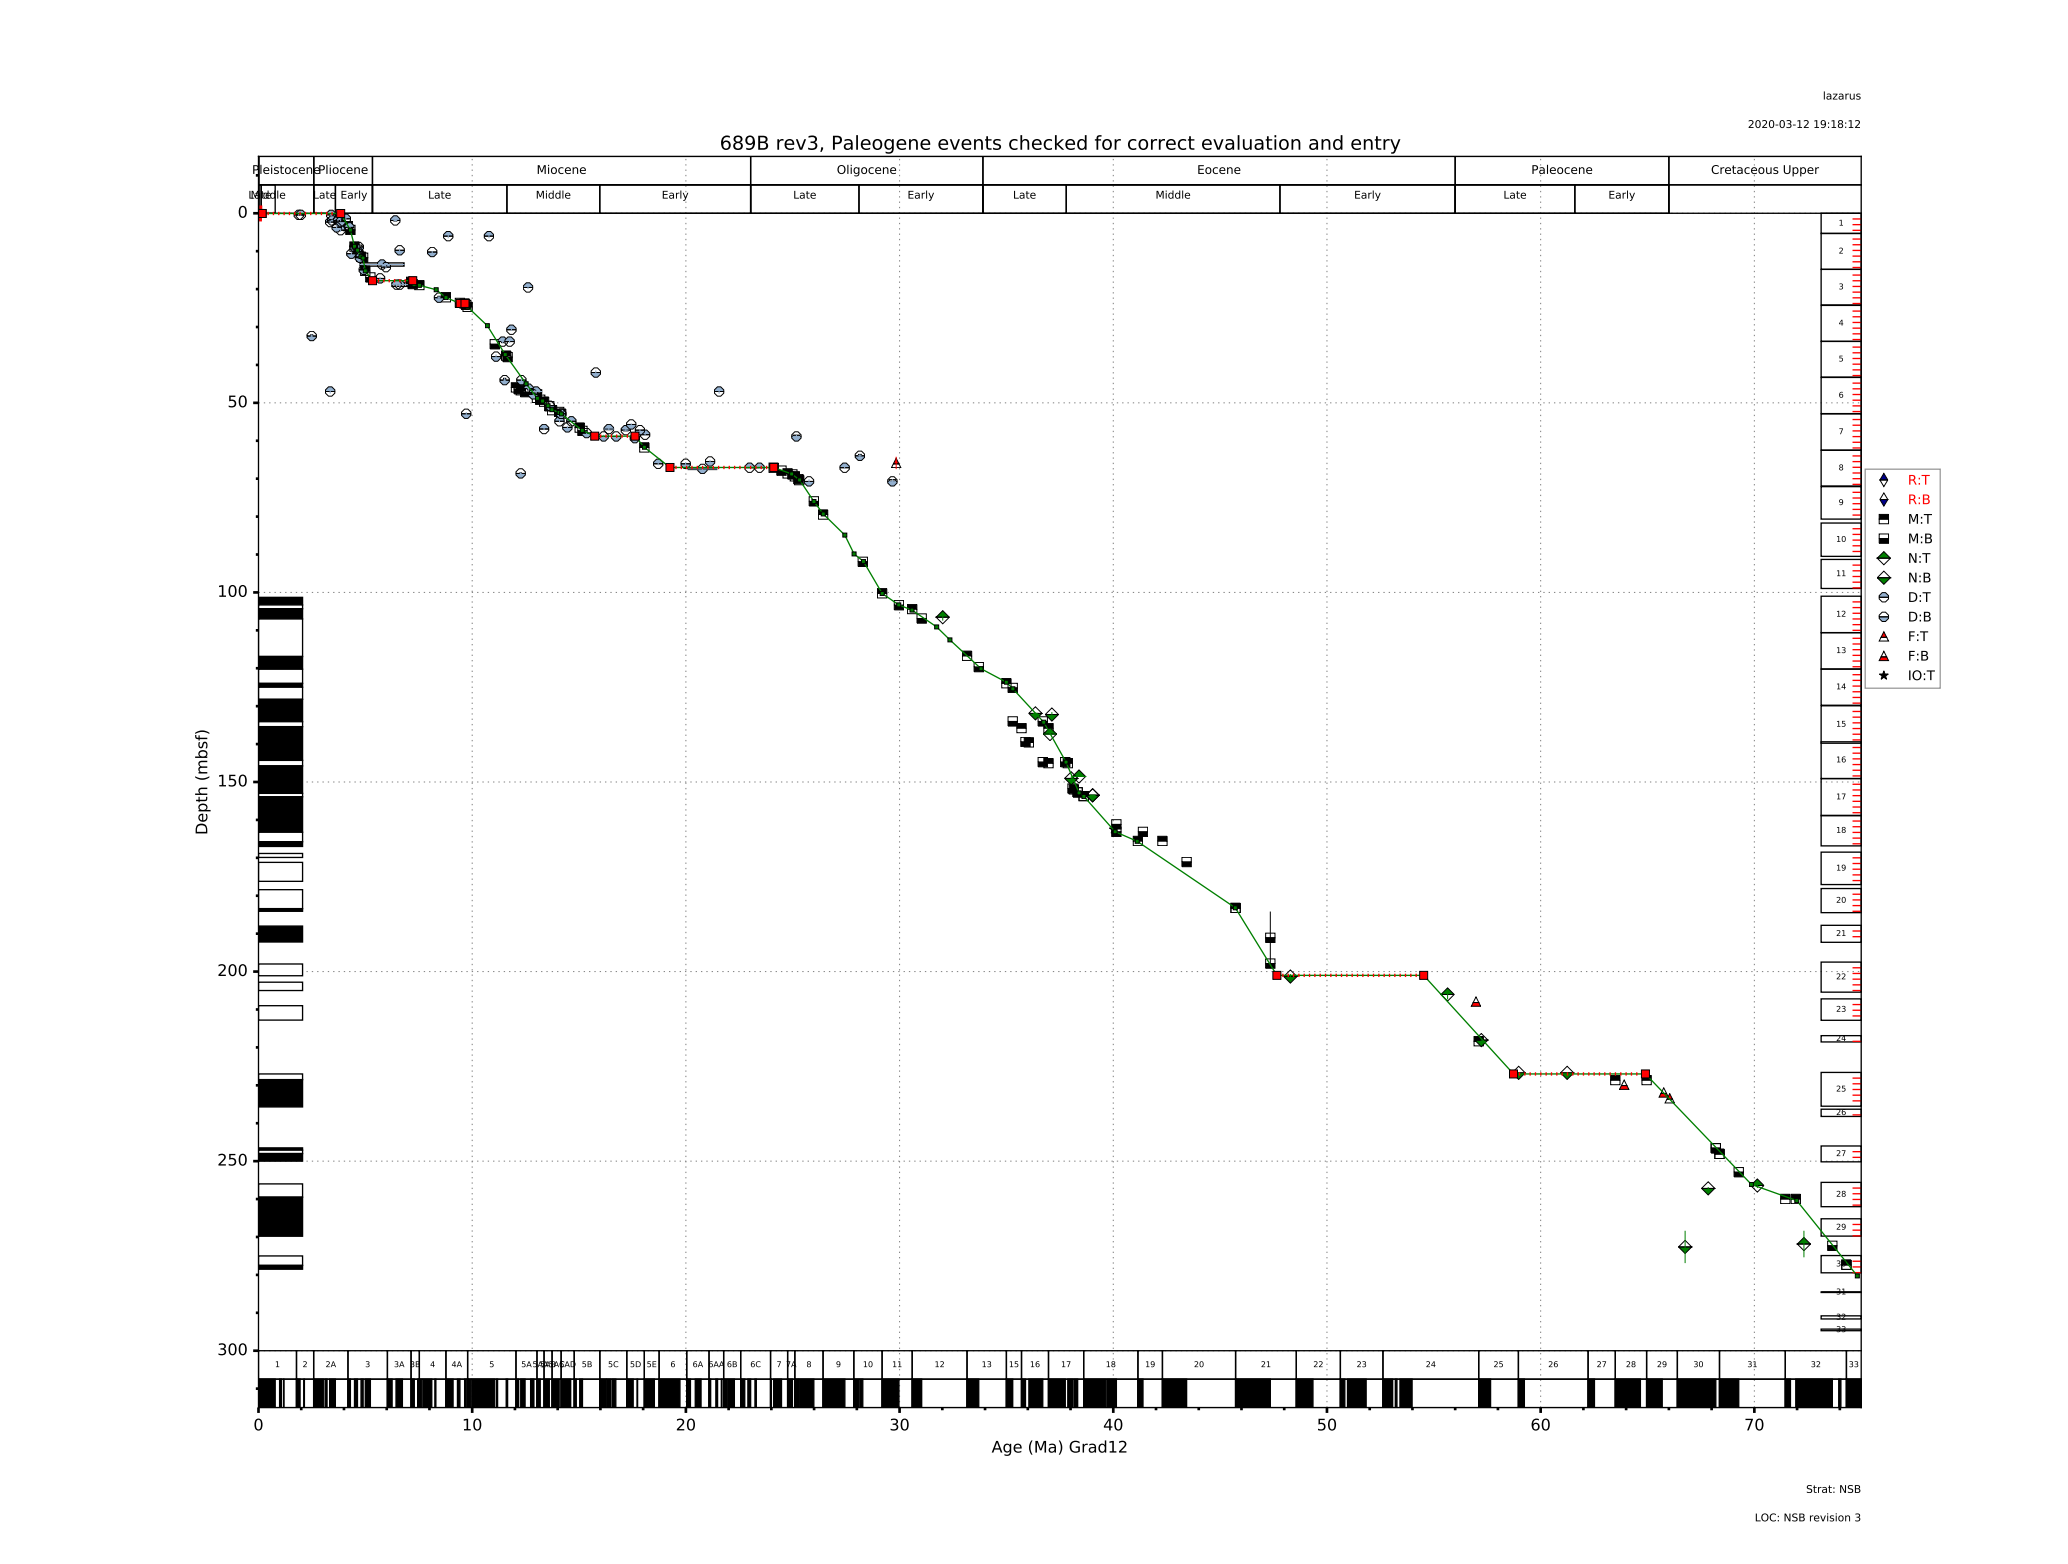


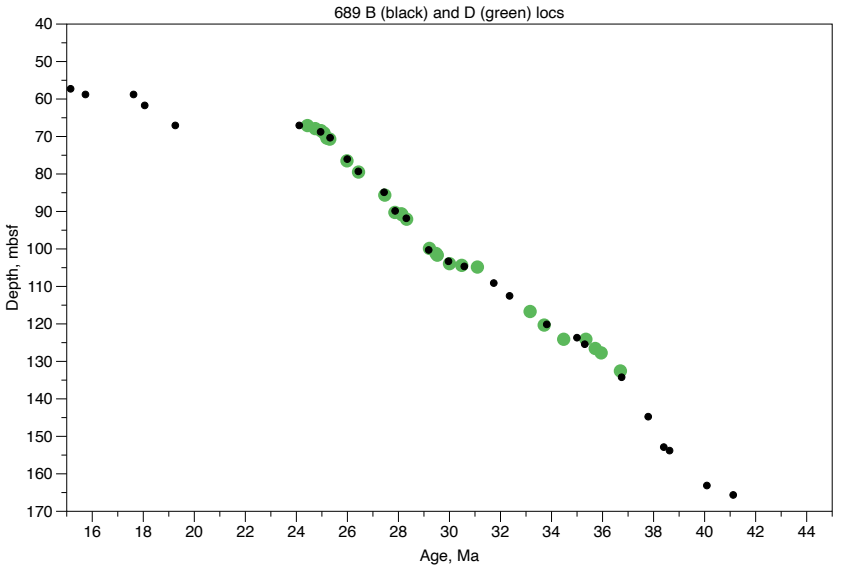


Figure S2 a-c Southern Ocean, Maud Rise ODP Site 689, holes B (top) and D (bottom) age-depth plots, and a cross-plot showing coherency between holes. This site has had multiple rounds of stratigraphic study and revision. The original paleomagnetic stratigraphy interpretation of Spiess (1990) for Hole B was re-evaluated and questionable magnetic data removed from the polarity interpretation (shown along the depth axis on left). Polarity intervals based on single samples were removed, and intervals of more than a couple meters with no measurements were shown as no data rather than as a continuous polarity interval. Florindo et al. (2005) created new data for Hole D and cross-compared the holes at selected intervals. This evaluation was used and extended to other depth intervals here, and as a result some polarity reversal boundaries were re-assigned to a different GPTS boundary. Both the older and new picks are shown on the plot for Hole 689B. As noted by Florindo et al. (2005) paleomagnetic stratigraphy at this site becomes unreliable below about 38 Ma.


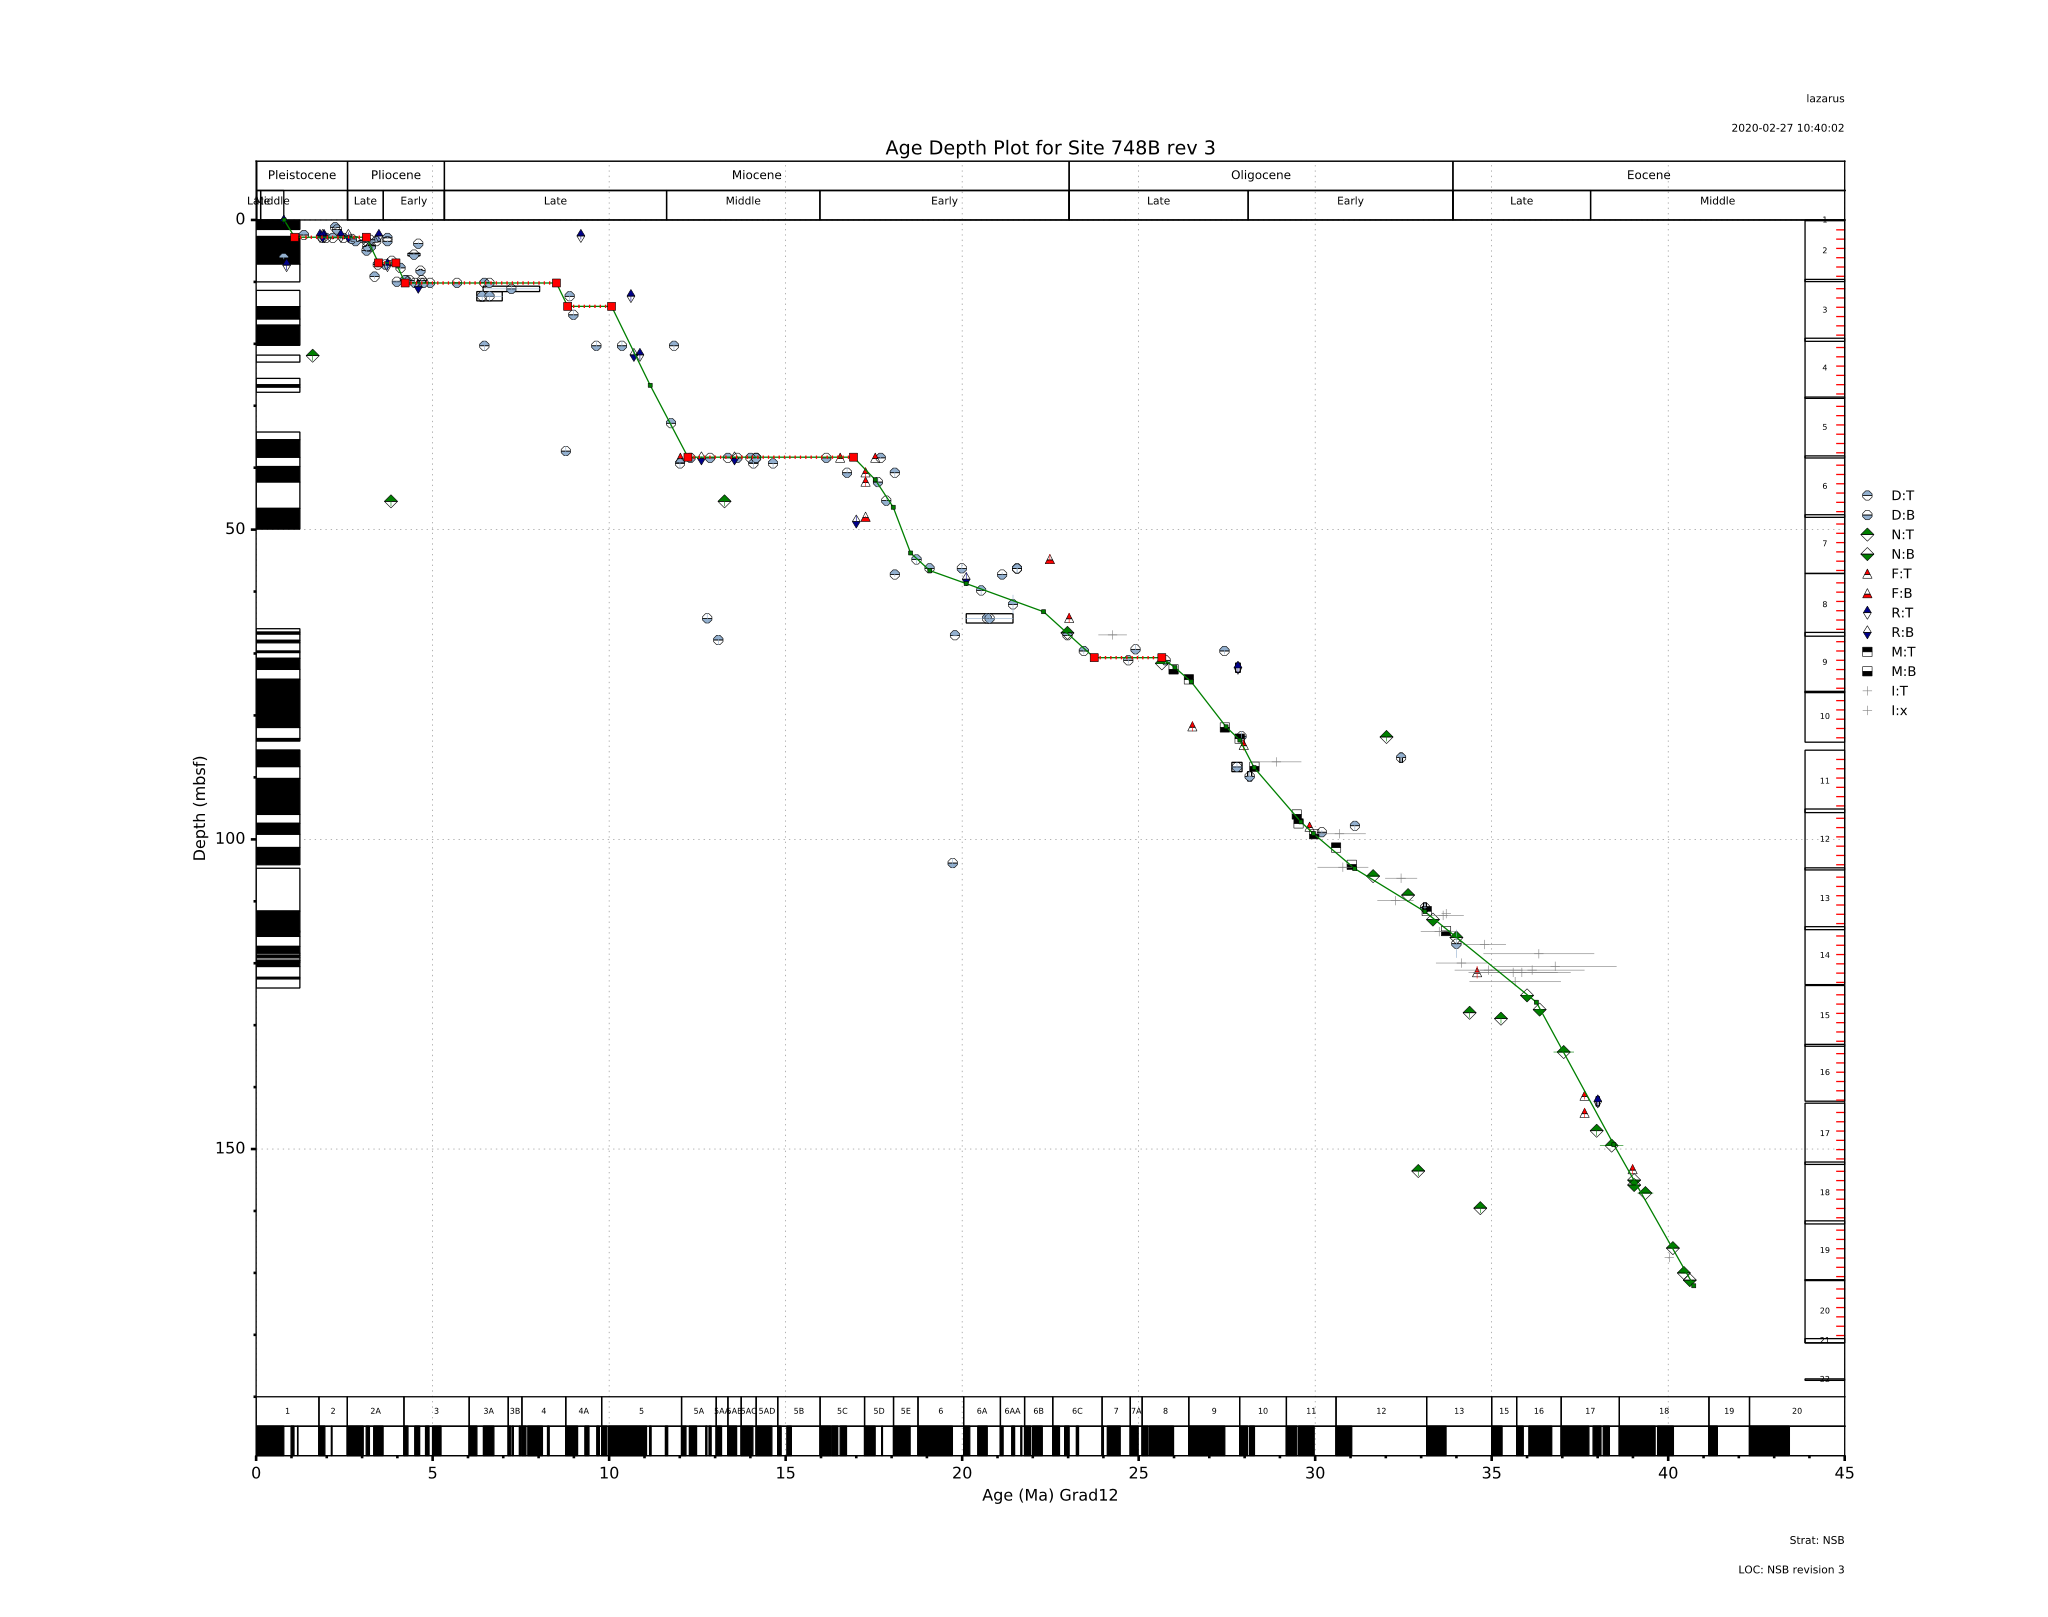


Figure S3: Southern Ocean, Kerguelen Plateau, ODP Site 748, hole B, age-depth plot. The Paleogene part of this Site was restudied, diatom events were recalibrated, strontium isotope data were generated and a new paleomagnetic stratigraphy was developed by Roberts et al (2003). Their interpretation is followed here. The Neogene has not yet been similarly revised.


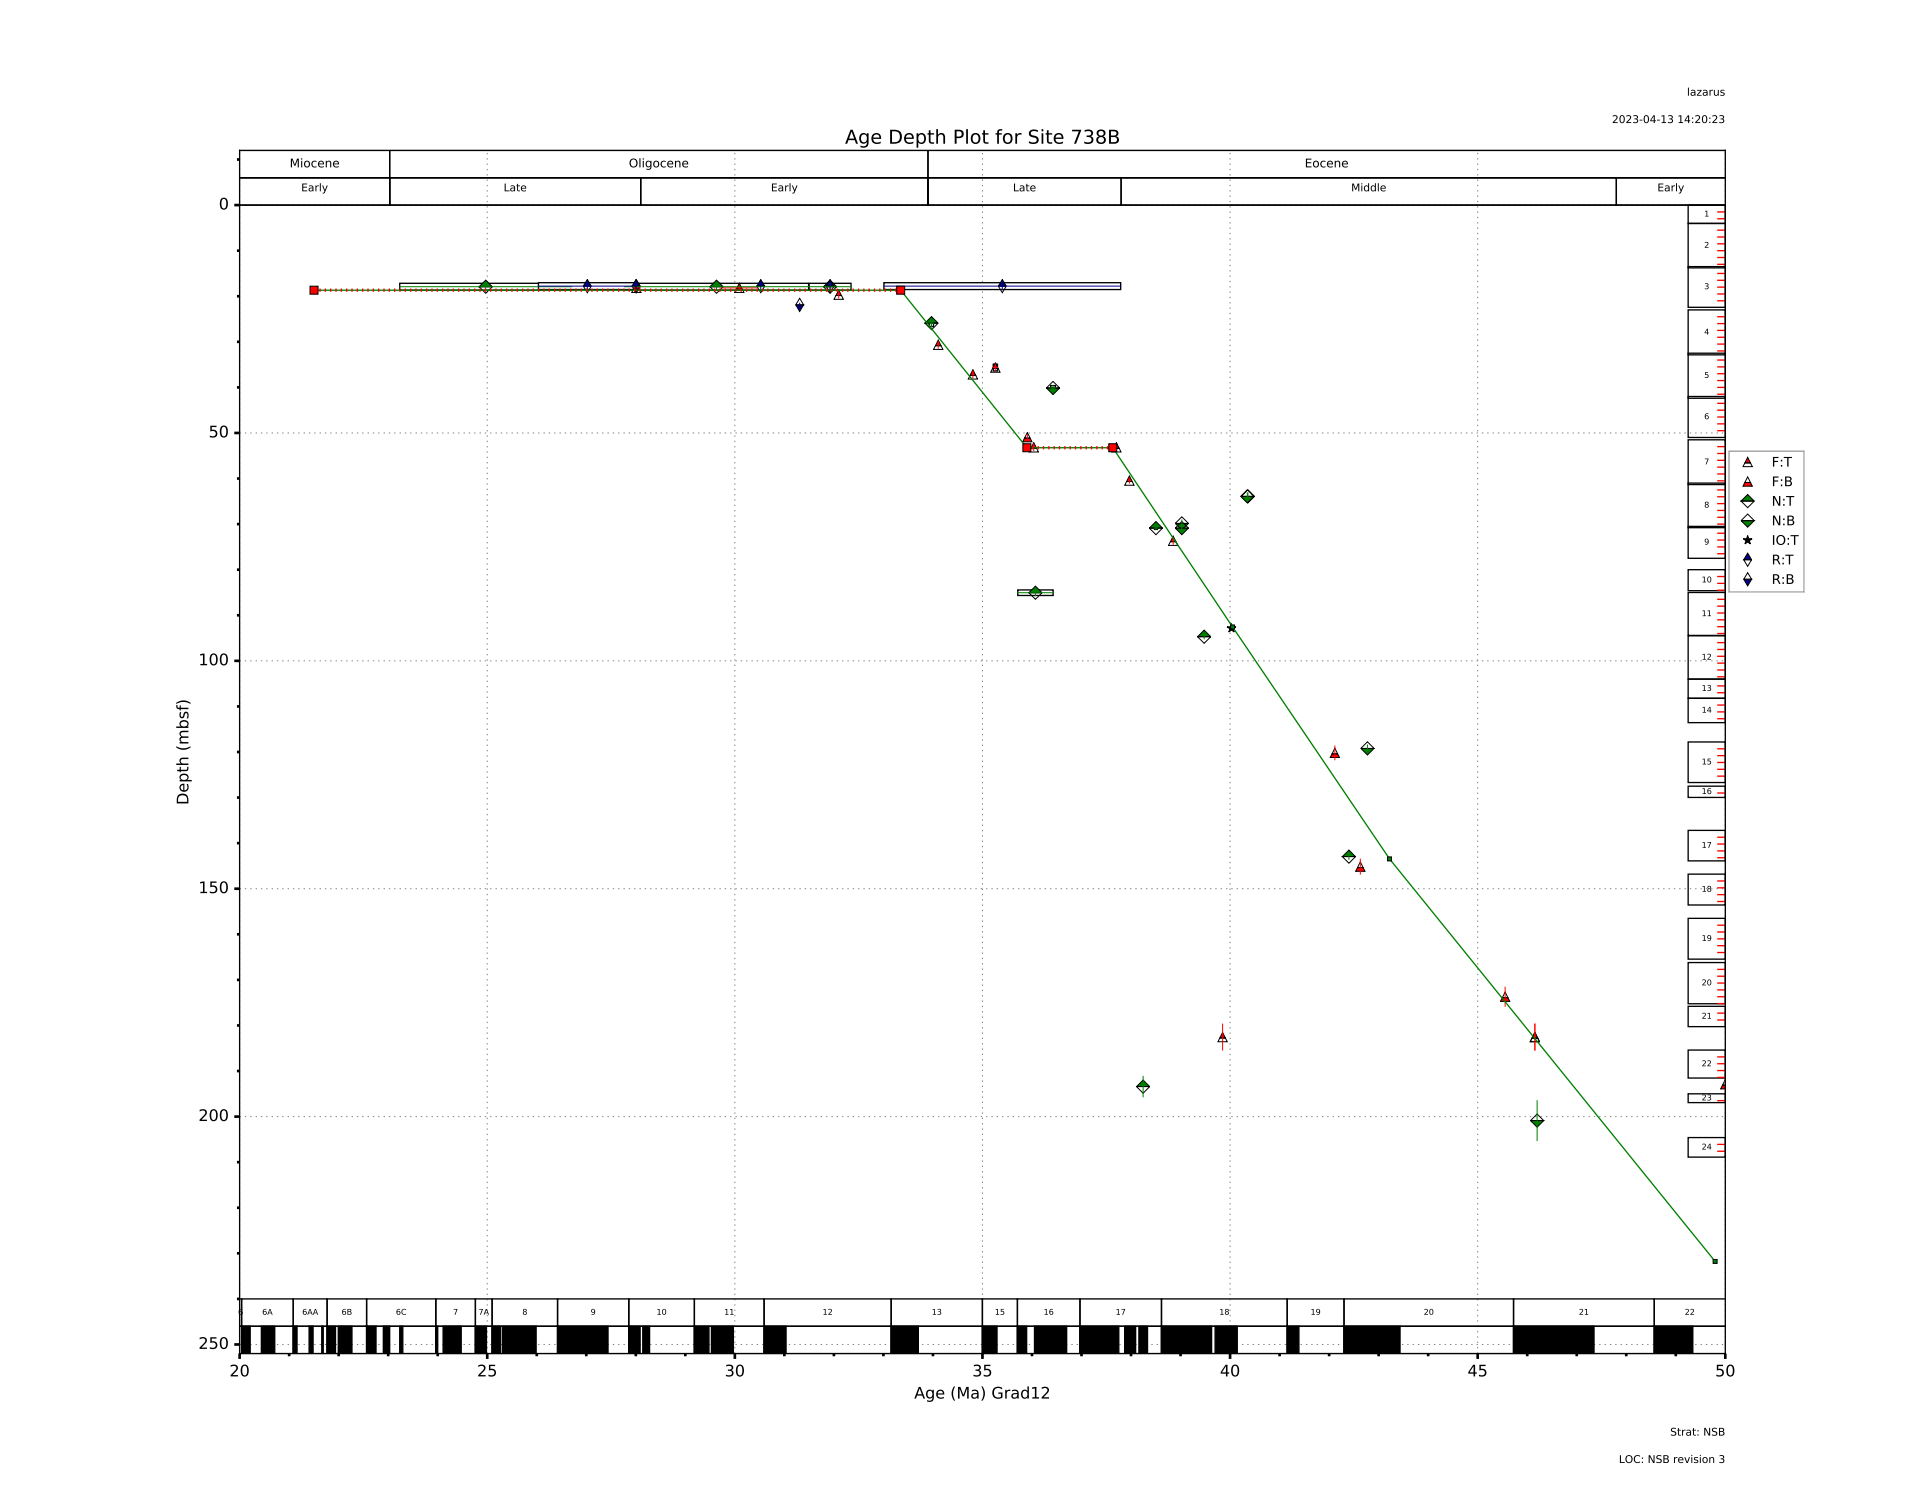


**a)**


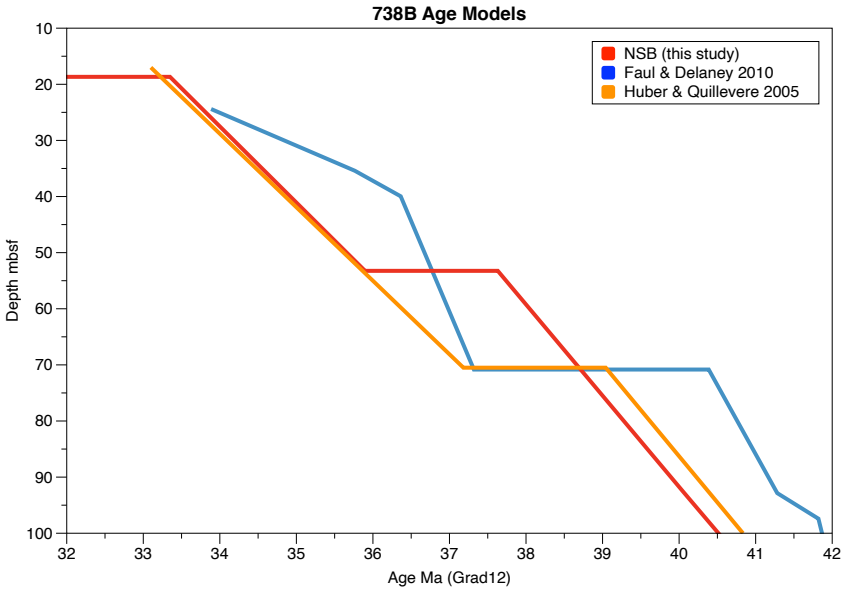


**b)**

Figure S4a-b: Southern Ocean, Kerguelen Plateau, ODP Site 738, hole B, age-depth plot, and alternative age models from the recent literature. Although there have been several studies and revisions of chronostratigraphic information for the older Paleogene part of this site (below ca 40 Ma) the late Eocene interval remains problematic and different interpretations are possible. Here we show, in addition to that used in our study, those of Huber and Quillevere (2005) and Faul and Delaney (2010). Differences in ages and sedimentation rates are substantial and thus productivity proxies based on accumulation rate are uncertain for the late Eocene interval of this site.

**a)**

**b)**


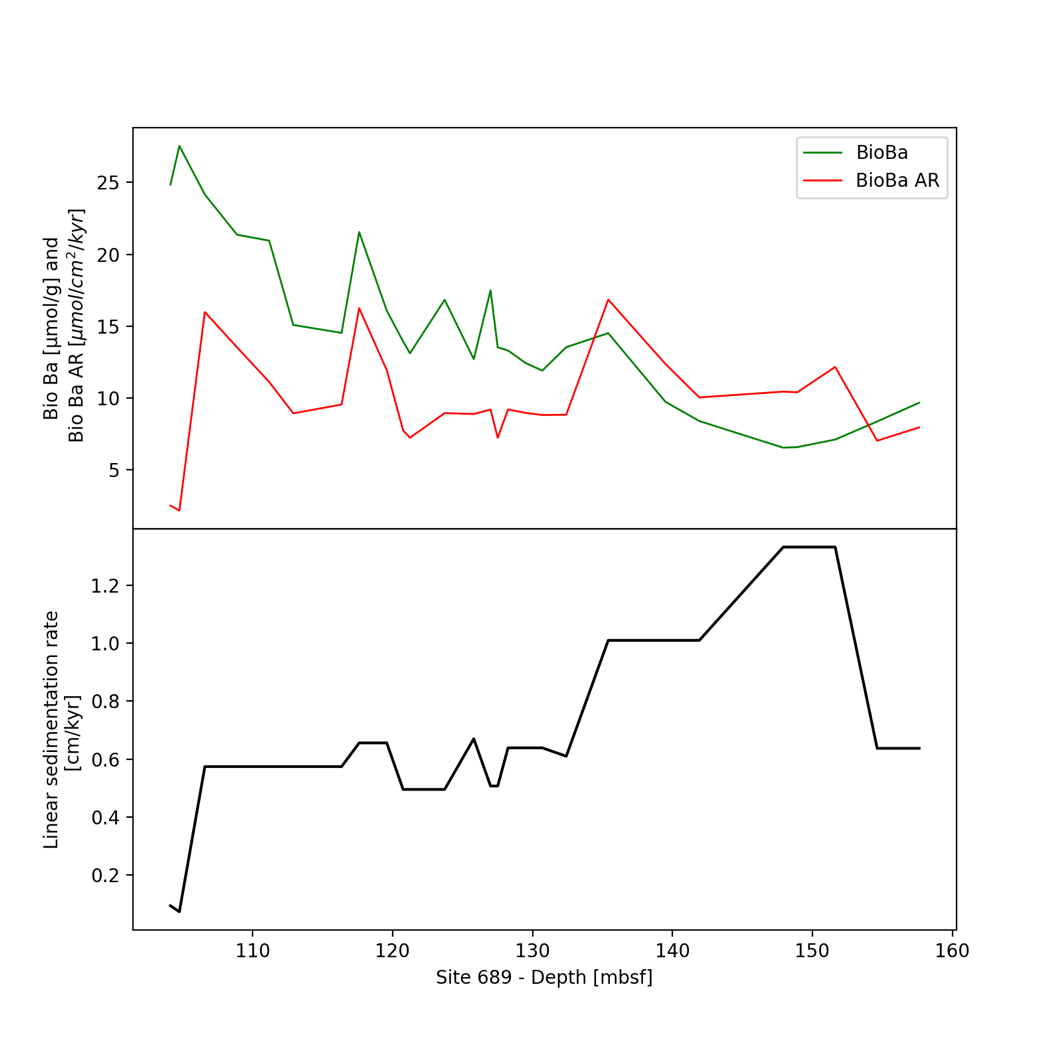

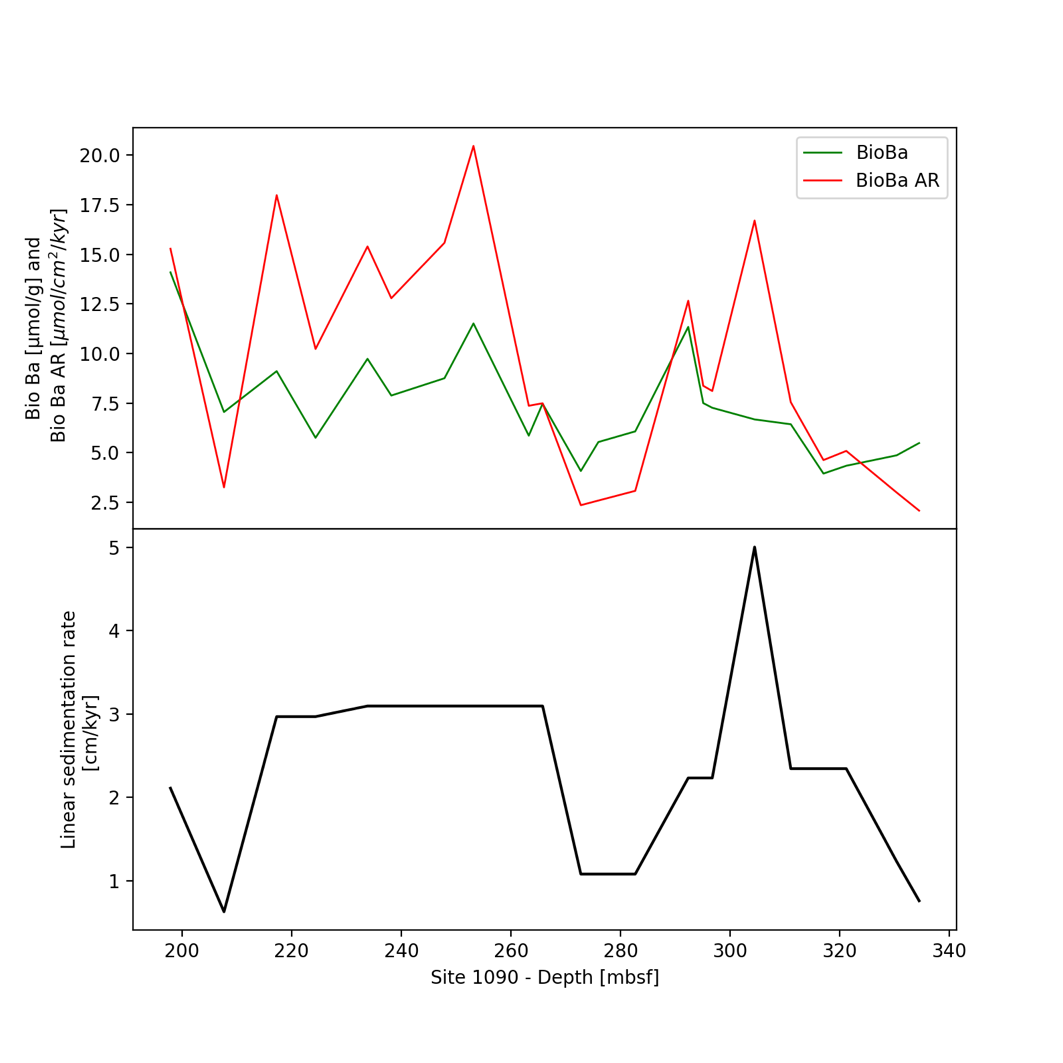


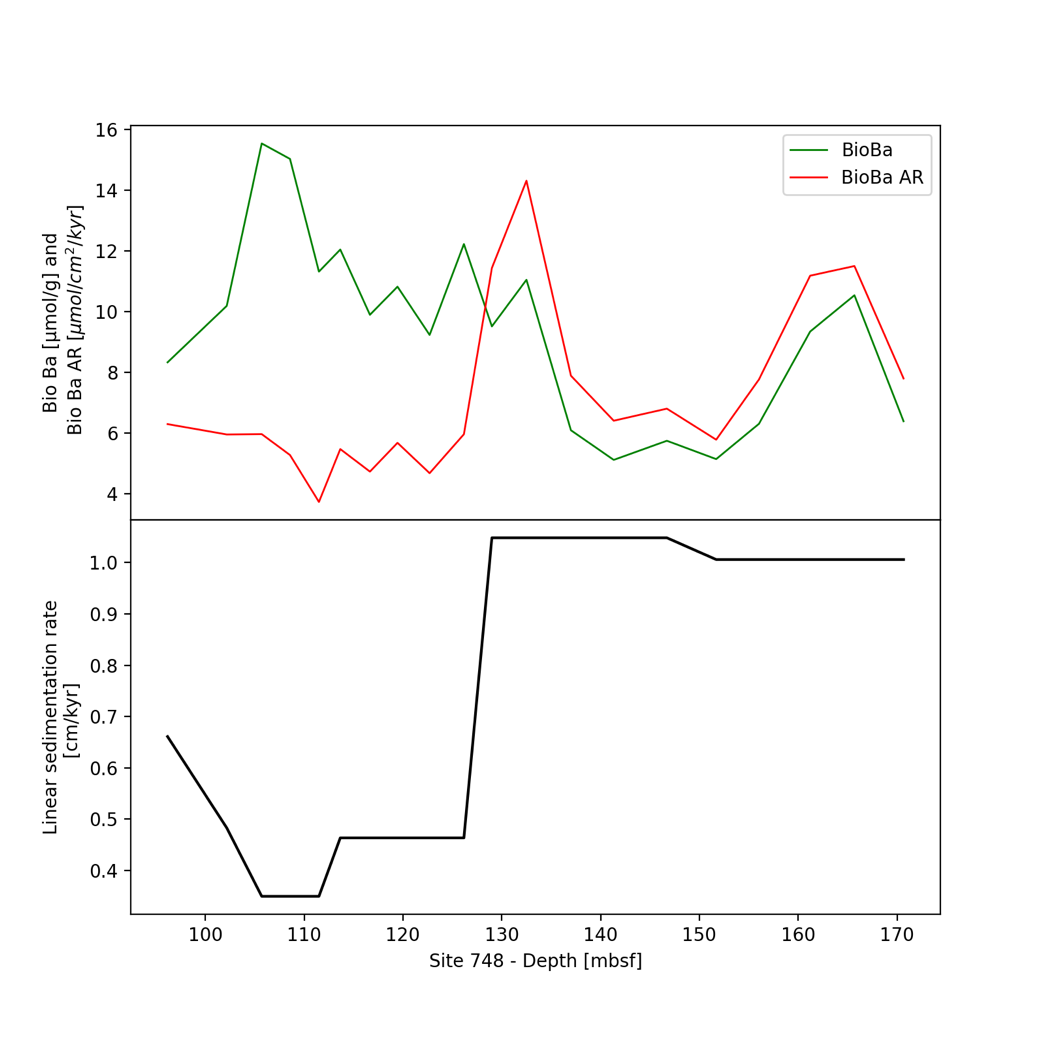


**c)**

Figure S5: Biogenic barium accumulation rates, Bio Ba AR and sedimentation rate ODP Site 1090 (a), ODP Site 689 (b), ODP Site 748 (c).


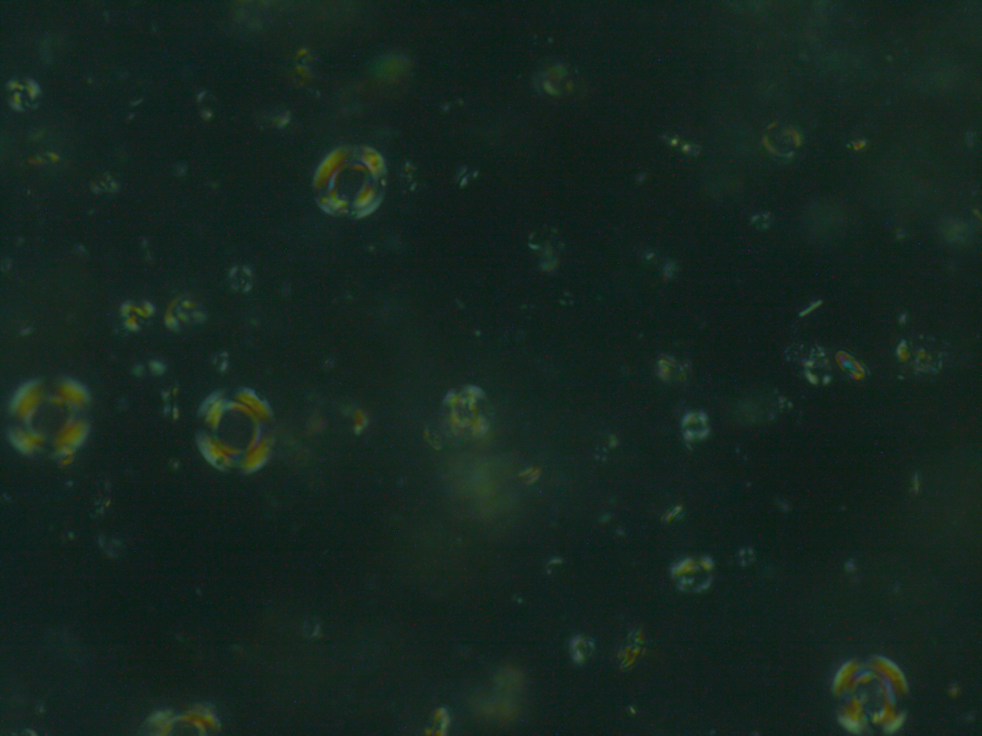


Figure S6: Polarised Microscope image from fine fraction sediments (<45µm) - coccoliths.

Figure S7: Compilation of paleo atmospheric pCO2 reconstructions. a) data from marine and terrestrial archives.b) Lowess fitted smoothed curves to various compilations of proxy pCO2 data: Black - all proxy data, including also Boron, paleosol and stomata estimates. Blue - all data from a single proxy (alkenones). Red - Single site alkenone proxy data from Zhang, with single outlier (>> 2,000 ppm) removed - same time series as in main text Figure 4.

Data sources given in Table S2. Other than a single outlier point (all alkenone curve, ca 33.1 Ma), Alkenone curves show coherent pattern of maximum values near 37 Ma, followed by declining values until ca 35 Ma, a smaller peak at ca 34.5, and a rapid decline at ca 34 Ma. Data younger than ca 32 Ma is relatively sparse and different data subsets do not show the same degree of coherency, although all agree on eventual decline to values near 40 ppm by ca 25 Ma.

Table S1: Neodymium isotopes data compilation from fossil fish teeth from the locations investigated in this study.
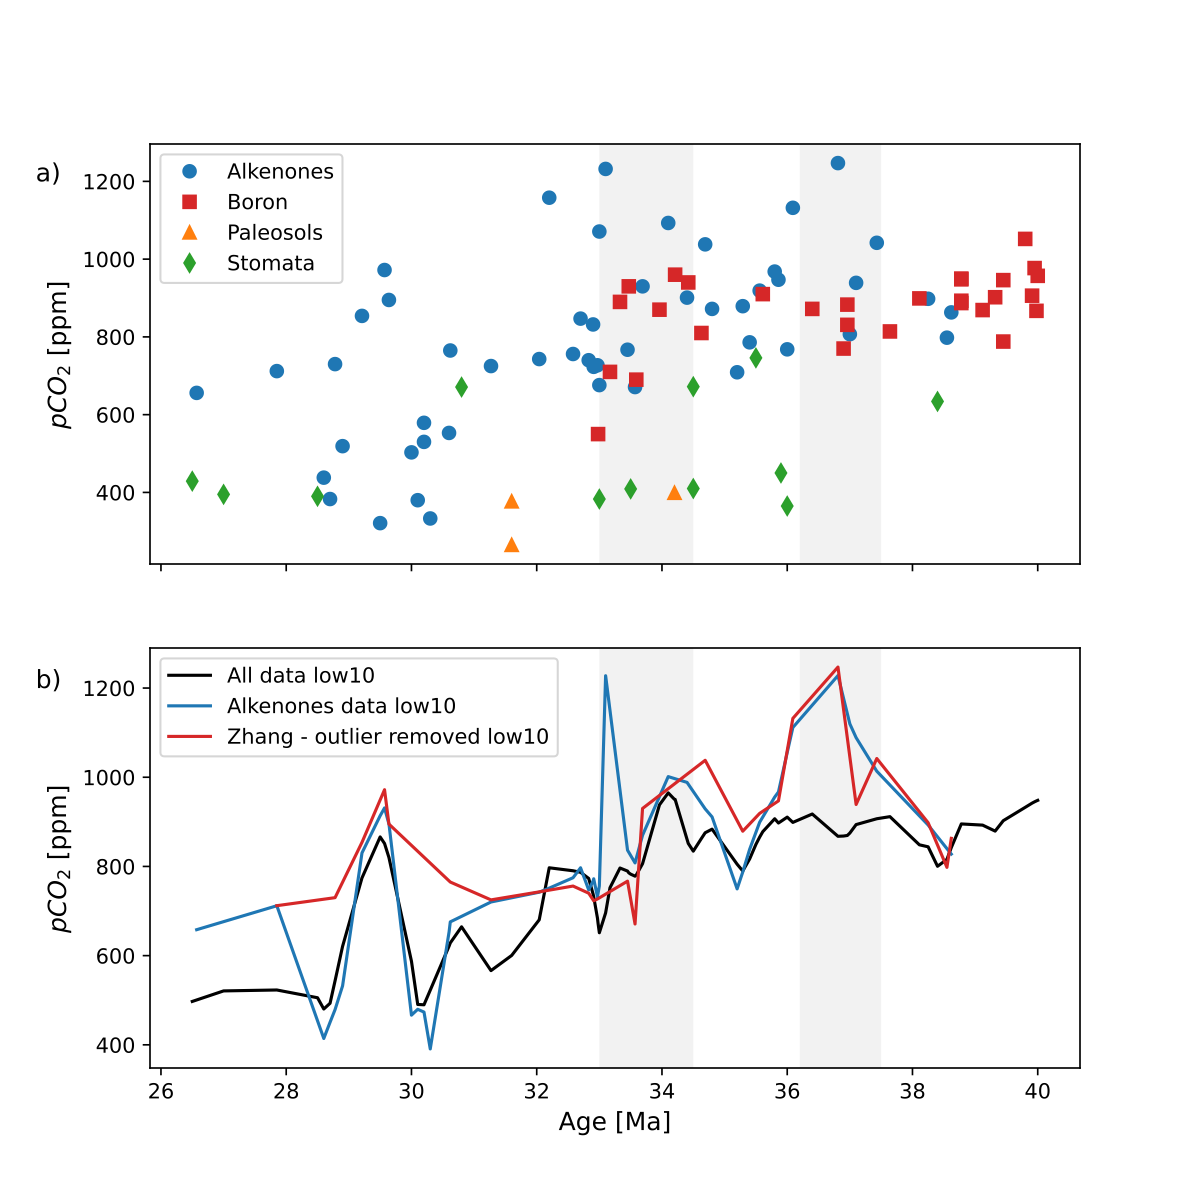


| **Sites** | **Hole** | **Location** | **Reference** |
| --- | --- | --- | --- |
| 1090 | B | Agulhas Ridge, South Atlantic Ocean | Scher and Martin [2006] |
| 689 | B | Maud Rise, Southern Ocean | Scher and Martin [2004] |
| 738 | B | Kerguelen Plateau, Indian Ocean | Scher and Delaney [2010] |
| 738 | B | Kerguelen Plateau, Indian Ocean | Scher et al. [2011] |
| 738 | B | Kerguelen Plateau, Indian Ocean | Scher et al. [2014] |
| 748 | B | Kerguelen Plateau, Indian Ocean | Wright et al. [2018] |
| 744 | A | Kerguelen Plateau, Indian Ocean | Wright et al. [2018] |

Table S2: *p*CO2 data compilation

| **Reference** | **Method** | **Sites** | **Location** |
| --- | --- | --- | --- |
| Pagani et al. 2005 (and 1999a, 1999b updated by Henderiks and Pagani 2008). | Alkenones | DSDPb Sites 511, 513, 516 and 612  ODP Site 803 | Atlantic Ocean  Equatorial Pacific |
| Zhang et al. [2013] | Alkenones | ODPa Site 925 A | Western equatorial Atlantic Ocean |
| Anagnostou et al. [2016] | Boron isotopes | TDP 12 e 13 | Tanzania |
| Anagnostou et al. [2020] | Boron isotopes | ODP Site 865 | Equatorial Pacific |
| Henehan et al. [2020] | Boron Isotopes | ODP Site 1260  ODP Site 865 | Equatorial Atlantic  Equatorial Pacific |
| Pearson et al. [2009] (updated by Anagnostou et al. 2016) | Boron isotopes | TDPc 12 e 13 | Tanzania |
| Breecker and Retallack, [2014] | Paleosols |  |  |
| Ekart et al. [1999] | Paleosols |  |  |
| Kohn et al. [2015] | Paleosols |  |  |
| Srivastava et al. [2013] | Paleosols |  |  |
| Doria et al. [2011] | Stomata |  |  |
| Erdei et al. [2012] | Stomata |  |  |
| Grein et al. [2013] (updates Roth-Nebelsick et al.2004, 2012) | Stomata |  |  |
| Kürschner et al. [2008] | Stomata |  |  |
| Reichgelt et al. [2016] | Stomata |  |  |
| Retallack [2009] | Stomata |  |  |
| Roth-Nebelsick et al. [2012] | Stomata |  |  |
| Roth-Nebelsick et al. [2014] | Stomata |  |  |
| Steinthorsdottir et al. [2016] | Stomata |  |  |
| Sun et al. [2017] | Stomata |  |  |

**Note: a Ocean Drilling Program; b Deep Sea Drilling Project; cTanzanian Drilling Project**

**References**

Anagnostou, E., John, E. H., Edgar, K. M., Foster, G. L., Ridgwell, A., Inglis, G. N., Pancost, R. D., Lunt, D. J., and Pearson, P. N. Changing atmospheric CO2 concentration was the primary driver of early Cenozoic climate: Nature, v. 533, pp. 380-384. https://doi.org/10.1038/nature17423, 2016.

Anagnostou, E., John, E. H., Babila, T.L., Sexton, P. F., Ridgwell, A., Lunt, D.J., Pearson, P.N., Chalk, T.B., Pancost, R.D. and Foster, G.L.Proxy evidence for state-dependence of climate sensitivity in the Eocene greenhouse. *Nature Communications,*11, 4436. https://doi.org/10.1038/s41467-020-17887-x, 2020.

Breecker, D. & Retallack, G. [Refining the pedogenic carbonate atmospheric CO₂ proxy and application to Miocene CO₂](https://doi.org/10.1016/j.palaeo.2014.04.012).*P alaeogeography, Palaeoclimatology, Palaeoecology, 406*, 1-8. <https://doi.org/10.1016/j.palaeo.2014.04.012>, 2014.

Channell, J. E. T., Galeotti, S., Martin, E.E., Billups, K., Scher, H.D., and Stoner, J.S. Eocene to Miocene magnetostratigraphy, biostratigraphy and chemostratigraphy at ODP Site 1090 (sub-Antarctic South Atlantic), Geol. Soc. Am. Bull., 115, 607–623, 2003.

Doria, G., [Royer, D. L.](http://orcid.org/0000-0003-0976-953X), Wolfe, A. P.,Fox, A., Westgate, J. A., & Beerling, D. J. [Declining atmospheric CO₂ during the late Middle Eocene climate transition](https://doi.org/10.2475/01.2011.03). *American Journal of Science, 311(1), 63-75.* <https://doi.org/10.2475/01.2011.03>, 2011.

Erdei, B., Utescher, T., Hably, L., Roth-Nebelsick, A., & Grein, M. [Early Oligocene Continental Climate of the Palaeogene Basin (Hungary and Slovenia) and the Surrounding Area](https://doi.org/10.3906/yer-1005-29). *Turkish Journal of Earth Sciences, 21*, 153-186. <https://doi.org/10.3906/yer-1005-29>, 2012.

Ekart, D. D. [A 400 million year carbon isotope record of pedogenic carbonate; implications for paleoatomospheric carbon dioxide](https://doi.org/10.2475/ajs.299.10.805). *American Journal of Science, 299* (10), 805-827.<https://doi.org/10.2475/ajs.299.10.805>, 1999.

Florindo, F. and Roberts, A. P. Eocene-Oligocene magnetobiochronology of ODP Sites 689 and 690, Maud Rise, Weddell Sea, Antarctica. Geological Society of America Bulletin, 117(1), 46–. doi:10.1130/b25541.1, 2005

Grein, M., Oehm, C., Konrad, W., Utescher, T., Kunzmann, L., and Roth-Nebelsick, A.: Atmospheric CO2 from the late Oligocene to early Miocene based on photosynthesis data and fossil leaf characteristics, *Palaeogeography, Palaeoclimatology, Palaeoecology., 374, 41–51*, https://doi.org/10.1016/j.palaeo.2012.12.025, 2013.

Henehan, M.; Edgar, K.M.; Foster, G.L., Penman, D.E.; Hull, P.M.; Greenop, R.; Anagnostou, E.; Pearson, P.N. Revisiting the Middle Eocene Climatic Optimum “Carbon Cycle Conundrum” with New Estimates of Atmospheric pCO2 from Boron Isotopes. *Paleoceanography and Paleoclimatology. 35(6)*. https://doi.org/10.1029/2019PA003713, 2020.

[Kohn, M. J.](http://orcid.org/0000-0002-7202-4525), Strömberg, C. A., Madden, R. H., Dunn, R. E., Evans, S., Palacios, A., & Carlini, A. A. [Quasi-static Eocene–Oligocene climate in Patagonia promotes slow faunal evolution and mid-Cenozoic global cooling](https://doi.org/10.1016/j.palaeo.2015.05.028). *Palaeogeography, Palaeoclimatology, Palaeoecology, 435*, 24-37. <https://doi.org/10.1016/j.palaeo.2015.05.028>, 2015.

Kürschner, W. M.,Kvaček, Z., &Dilcher, D. L.[The impact of Miocene atmospheric carbon dioxide fluctuations on climate and the evolution of terrestrial ecosystems](https://doi.org/10.1073/pnas.0708588105). *Proceedings of the National Academy of Sciences, 105*(2), 449-453. <https://doi.org/10.1073/pnas.0708588105>, 2008.

Pagani, M. [Late Miocene Atmospheric CO₂ Concentrations and the Expansion of C4 Grasses](https://doi.org/10.1126/science.285.5429.876). *Science, 285*(5429), 876-879. <https://doi.org/10.1126/science.285.5429.876>, 1999.

Pagani, M.,Arthur, M. A., & Freeman, K. H. [Miocene evolution of atmospheric carbon dioxide](https://doi.org/10.1029/1999pa900006). *Paleoceanography, 14*(3), 273-292. <https://doi.org/10.1029/1999pa900006>, 1999.

Pagani, M., Zachos, J. C., Freeman, K. H., Tipple, B., and Bohaty, S. Marked decline in atmospheric carbon dioxide concentrations during the Paleogene.Science, 309 600–603. DOI: 10.1126/science.111006, 2005

Pagani, M., Huber, M., Liu, Z., Bohaty, S.M., Henderiks, J., Sijp, W., Krishnan, S. & DeConto, R.M. The role of carbon dioxide during the onset of Antarctic glaciation. Science, 334, 1261-1264. DOI: 10.1126/science.1203909, 2011.

Pearson, P., Foster, G. and Wade, B. Atmospheric carbon dioxide through the Eocene–Oligocene climate transition. Nature, 461, 1110–1113. https://doi.org/10.1038/nature08447, 2009.

[Reichgelt, T.](http://orcid.org/0000-0001-8652-5489), D'Andrea, W. J., & Fox, B. R. Abrupt plant physiological changes in southern New Zealand at the termination of the Mi-1 event reflect shifts in hydroclimate and *p*CO₂. *Earth and Planetary Science Letters, 455*, 115-124.<https://doi.org/10.1016/j.epsl.2016.09.026>, 2016

Renaudie, J., Lazarus, D. and Diver, P. NSB (Neptune Sandbox Berlin): An expanded and improved database of marine planktonic microfossil data and deep-sea stratigraphy. Palaeontologia Electronica,23(1):a11 https://doi.org/10.26879/1032, 2020.

Retallack, G. J.: Refining a pedogenic-carbonate CO2 paleobarometer to quantify a middle Miocene greenhouse spike, *Palaeogeography Palaeoclimatology, Palaeoecology, 281, 57–65,* https://doi.org/10.1016/j.palaeo.2009.07.011, 2009.

Roberts, A.P., Bicknell, S.J., Byatt, J., Bohaty, S.M., Florindo, F., and Harwood, D.M. Magnetostratigraphic calibration of Southern Ocean diatom datums from the Eocene-Oligocene of Kerguelen Plateau (Ocean Drilling Program Sites 744 and 748): Palaeogeography, Palaeoclimatology, Palaeoecology, v. 198, p. 145–168, doi: 10.1016/S0031-0182(03)00397-3, 2003.

Roth-Nebelsick, A., Utescher, T., Mosbrugger, V., Diester-Haass, L., and Walther, H.: Changes in atmospheric CO2 concentrations and climate from the Late Eocene to Early Miocene: palaeobotanical reconstruction based on fossil floras from Saxony, Germany, *Palaeogeography Palaeoclimatology Palaeoecology*, 205, 43–67, https://doi.org/10.1016/j.palaeo.2003.11.014, 2004.

Roth-Nebelsick, A., Grein, M., Utescher, T., and Konrad, W.: Stomatal pore length change in leaves of *Eotrigonobalanus furcinervis* (Fagaceae) from the Late Eocene to the Latest Oligocene and its impact on gas exchange and CO2 reconstruction*, Rev. Palaeobot. Palynol., 174, 106–112,* https://doi.org/10.1016/j.revpalbo.2012.01.001, 2012.

Roth-Nebelsick, A., Oehm, C., Grein, M., Utescher, T., Kunzmann, L., Friedrich, J.-P., & Konrad, W. Stomatal density and index data of Platanus neptuni leaf fossils and their evaluation as a CO2 proxy for the Oligocene. *Review of Palaeobotany and Palynology*, 206,1–9. <https://doi.org/10.1016/j.revpalbo.2014.03.001>, 2014.

Scher, H.D. andMartin, E.E. Circulation in the Southern Ocean during the Paleogene inferred from neodymium isotopes. Earth Planet. Sci. Lett. 228, 391–405. https:// doi.org/10.1016/J.EPSL.2004.10.016, 2004.

Scher, H. D. and Martin, E. E. Timing and climatic consequences of the opening of Drake Passage. Science, 312, 428–430. DOI: 10.1126/science.1120044, 2006.

Scher H. D., Delaney M. L. Breaking the glass ceiling for high resolution Nd isotope records in early Cenozoic paleoceanography. *Chemical Geology, 269 (3-4), 329–338*. <https://doi.org/10.1016/j.chemgeo.2009.10.007>, 2010.

Scher, H.D., Bohaty, S.M., Zachos, J.C., Delaney. M.L. Two-stepping into the icehouse: East Antarctic weathering during progressive ice-sheet expansion at the Eocene–Oligocene transition. *Geology,* 2011;; 39 (4): 383–386. doi:<https://doi.org/10.1130/G31726.1>, 2011.

Scher, H.D., Bohaty, S.M., Smith, B.W., Munn, G.H. Isotopic interrogation of a suspected late Eocene glaciation. Paleoceanography 29, 628–644. https://doi.org/ 10.1002/2014PA002648, 2014.

Spiess, V. Cenozoic magnetostratigraphy of Leg 113 drill sites, Maud Rise, Weddell Sea, Antarctica, In: Barker, P. F., et al., (eds). Proceedings of the Ocean Drilling Program: College Station, Texas, Scientific Results, v. 113, p. 261–318. https://doi.org/10.2973/odp.proc.sr.113.182.1990, 1990.

[Steinthorsdottir, M.](http://orcid.org/0000-0002-7893-1142), Porter, A. S., Holohan, A., Kunzmann, L., Collinson, M., & McElwain, J. C. [Fossil plant stomata indicate decreasing atmospheric CO₂ prior to the Eocene–Oligocene boundary](https://doi.org/10.5194/cp-12-439-2016). *Climate of the Past, 12*(2), 439-454.<https://doi.org/10.5194/cp-12-439-2016>, 2016.

Sun, B. N., Wang, Q. J., Konrad, W., Ma, F. J., Dong, J. L., & Wang, Z. X. [Reconstruction of atmospheric CO₂ during the Oligocene based on leaf fossils from the Ningming Formation in Guangxi, China](https://doi.org/10.1016/j.palaeo.2016.09.015). *Palaeogeography, Palaeoclimatology, Palaeoecology, 467*, 5-15.<https://doi.org/10.1016/j.palaeo.2016.09.015>, 2017.

Wright, N.M., Scher, H.D., Seton, M., Huck, C.E., Duggan, B.D. No change in Southern Ocean Circulation in the Indian Ocean from the Eocene through Late Oligocene. Paleoceanography, Paleoclimatology, 33, 152–167. https://doi.org/10.1002/ 2017PA003238, 2018.

Zhang, Y. G., Pagani, M., Liu, Z., Bohaty, S. M., and DeConto, R. A 40-million-year history of atmospheric CO2. Philosophical Transactions of the Royal Society A, v. 371, https://doi.org/10.1098/rsta.2013.0096, 2013.
